# Supplementary material
Source: PubMed Central journal article supplement (PMC3040269)

**Supplemental Figure Legend.**

**Supplemental Figure 1.** c-Fos immunoreactivity in VTA neurons following C) saline or D) 1nmol AgRP injection.

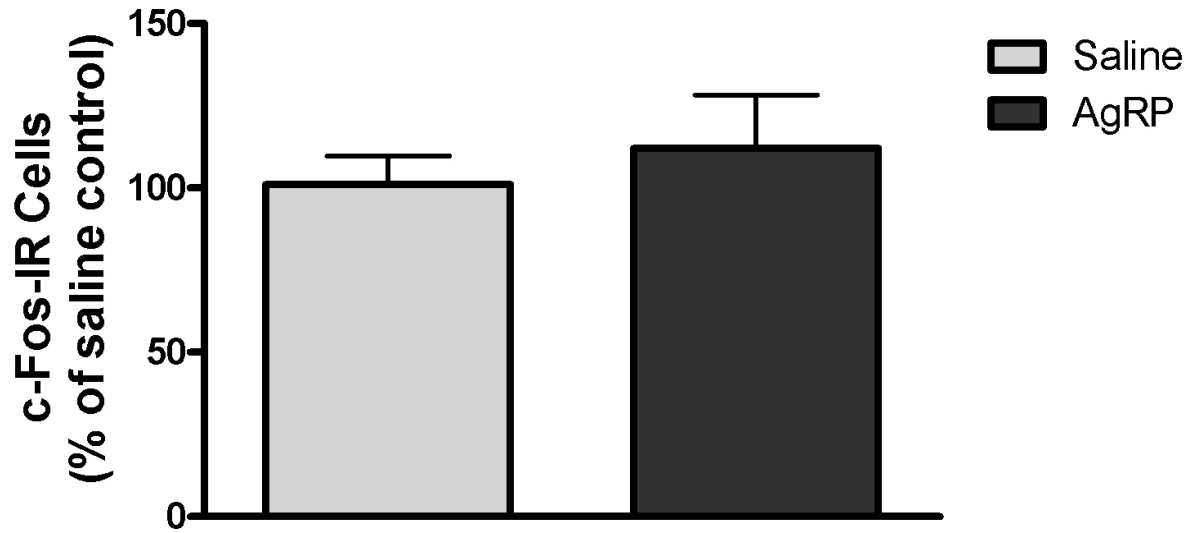

Supplement: NIHMS260908-supplement-01.pdf [file NIHMS260908-supplement-01.pdf]
